# Supplementary material
Source: HighWire-hosted journal article supplement (https://gh.bmj.com/content/8/3/e010157)
Supplement: inline-supplementary-material-1 [file inline-supplementary-material-1.pdf]

**Supplement 1. Final search strategy**

## Global Health Database

|          | <b>Searches</b>                                                                                                                                                                                                                                                                                                                                                                                                                                                                                                                                                                                                                                                                                                                                                                                                                                                                                                                                                                                                                                                                            | <b>Results</b> |
|----------|--------------------------------------------------------------------------------------------------------------------------------------------------------------------------------------------------------------------------------------------------------------------------------------------------------------------------------------------------------------------------------------------------------------------------------------------------------------------------------------------------------------------------------------------------------------------------------------------------------------------------------------------------------------------------------------------------------------------------------------------------------------------------------------------------------------------------------------------------------------------------------------------------------------------------------------------------------------------------------------------------------------------------------------------------------------------------------------------|----------------|
| <b>1</b> | (title:(justice or fairness or fair or ethics or ethical or equit*) OR ab:(justice or fairness or fair or ethics or ethical or equit*) OR ab:(benefit and sharing) AND yr:[2016 TO 2020]) AND (title:(health or medical) OR ab:(health or medical) AND yr:[2016 TO 2020]) AND (((title:((data or database* or dataset*) and (share* or sharing or release* or releasing or disseminat* or distribut* or export* or recycl* or access* or reuse* or management or ownership)) OR title:(information and (share* or sharing or release* or releasing or disseminat* or distribut* or export* or recycl* or access* or reuse* or management or ownership)) OR title:(secondary analysis) OR title:(finding* and (share* or sharing or release* or releasing or disseminat* or distribut* or export* or recycl* or access* or reuse* or management or ownership)) OR title:(result* and (share* or sharing or release* or releasing or disseminat* or distribut* or export* or recycl* or access* or reuse* or management or ownership)) OR title:(data and research))) AND yr:[2016 TO 2020]) | 68             |

## Embase (Ovid SP) and Medline (Ovid SP)

|          | <b>Searches</b>                                                                                                                                                                                 | <b>Results</b> |
|----------|-------------------------------------------------------------------------------------------------------------------------------------------------------------------------------------------------|----------------|
| <b>1</b> | ((data or database* or dataset*) and (share* or sharing or release* or releasing or disseminat* or distribut* or export* or recycl* or access* or reuse* or management or ownership)).ti.       | 24500          |
| <b>2</b> | ((information and (share* or sharing or release* or releasing or disseminat* or distribut* or export* or recycl* or access* or reuse* or management or ownership)) or "secondary analysis").ti. | 19385          |
| <b>3</b> | (finding* and (share* or sharing or release* or releasing or disseminat* or distribut* or export* or recycl* or access* or reuse* or management or ownership)).ti.                              | 5202           |
| <b>4</b> | (result* and (share* or sharing or release* or releasing or disseminat* or distribut* or export* or recycl* or access* or reuse* or management or ownership)).ti.                               | 21244          |
| <b>5</b> | (data or database or research or science).ti.                                                                                                                                                   | 1165568        |
| <b>6</b> | ((data or database* or research or science) and ("open access" or open)).ti,ab.                                                                                                                 | 339103         |

|           |                                                                                          |          |
|-----------|------------------------------------------------------------------------------------------|----------|
| <b>7</b>  | (justice or fairness or fair or ethics or ethical or equit* or "benefit sharing").ti,ab. | 472661   |
| <b>8</b>  | 1 or 2 or 3 or 4 or 6                                                                    | 405201   |
| <b>9</b>  | (health or medical).mp.                                                                  | 10488669 |
| <b>10</b> | 5 and 7 and 8 and 9                                                                      | 1319     |
| <b>11</b> | 10                                                                                       | 1319     |
| <b>12</b> | limit 11 to english language                                                             | 1268     |
| <b>13</b> | limit 12 to humans                                                                       | 1035     |
| <b>14</b> | limit 13 to yr="2015 - 2021"                                                             | 616      |

## Web of Science

|            | <b>Search</b>                                                                                                                                                                                                                                                                                                                     | <b>Results</b> |
|------------|-----------------------------------------------------------------------------------------------------------------------------------------------------------------------------------------------------------------------------------------------------------------------------------------------------------------------------------|----------------|
| <b># 1</b> | ti= ((data or database* or dataset*)<br><br>and<br><br>(share* or sharing or release* or releasing or disseminat* or distribut* or export* or recycl* or access* or reuse* or management or ownership)<br><br>Indexes=SCI-EXPANDED, SSCI, A&HCI, CPCI-S, CPCI-SSH, BKCI-S, BKCI-SSH, ESCI, CCR-EXPANDED, IC<br>Timespan=All years | 53,518         |
| <b># 2</b> | ti=(information and (share* or sharing or release* or releasing or disseminat* or distribut* or export* or recycl* or access* or reuse* or management or ownership ) or "secondary analysis")<br><br>Indexes=SCI-EXPANDED, SSCI, A&HCI, CPCI-S, CPCI-SSH, BKCI-S, BKCI-SSH, ESCI, CCR-EXPANDED, IC<br>Timespan=All years          | 33,586         |
| <b># 3</b> | ti=(finding* and (share* or sharing or release* or releasing or disseminat* or distribut* or export* or recycl* or access* or reuse* or management or ownership)<br><br>Indexes=SCI-EXPANDED, SSCI, A&HCI, CPCI-S, CPCI-SSH, BKCI-S, BKCI-SSH, ESCI, CCR-EXPANDED, IC<br>Timespan=All years                                       | 3,611          |

|             |                                                                                                                                                                                                                                                                                             |           |
|-------------|---------------------------------------------------------------------------------------------------------------------------------------------------------------------------------------------------------------------------------------------------------------------------------------------|-----------|
| <b># 4</b>  | ti= (result* and (share* or sharing or release* or releasing or disseminat* or distribut* or export* or recycl* or access* or reuse* or management or ownership)<br><br>Indexes=SCI-EXPANDED, SSCI, A&HCI, CPCI-S, CPCI-SSH, BKCI-S, BKCI-SSH, ESCI, CCR-EXPANDED, IC<br>Timespan=All years | 15,654    |
| <b># 5</b>  | ti= (data or database or research or science)<br><br>Indexes=SCI-EXPANDED, SSCI, A&HCI, CPCI-S, CPCI-SSH, BKCI-S, BKCI-SSH, ESCI, CCR-EXPANDED, IC<br>Timespan=All years                                                                                                                    | 1,797,781 |
| <b># 6</b>  | ts= ((data or database* or research or science)<br><br>and ("open access" or open)<br><br>Indexes=SCI-EXPANDED, SSCI, A&HCI, CPCI-S, CPCI-SSH, BKCI-S, BKCI-SSH, ESCI, CCR-EXPANDED, IC<br>Timespan=All years                                                                               | 426,849   |
| <b># 7</b>  | ts=(justice<br>or fairness or fair or ethics or ethical or equit* or "benefit<br><br>sharing")<br><br>Indexes=SCI-EXPANDED, SSCI, A&HCI, CPCI-S, CPCI-SSH, BKCI-S, BKCI-SSH, ESCI, CCR-EXPANDED, IC<br>Timespan=All years                                                                   | 571,310   |
| <b># 8</b>  | #1 or #2 or #3 or #4 or #6<br><br>Indexes=SCI-EXPANDED, SSCI, A&HCI, CPCI-S, CPCI-SSH, BKCI-S, BKCI-SSH, ESCI, CCR-EXPANDED, IC<br>Timespan=All years                                                                                                                                       | 526,569   |
| <b># 9</b>  | ts= (health or medical)<br><br>Indexes=SCI-EXPANDED, SSCI, A&HCI, CPCI-S, CPCI-SSH, BKCI-S, BKCI-SSH, ESCI, CCR-EXPANDED, IC<br>Timespan=All years                                                                                                                                          | 3,256,404 |
| <b># 10</b> | #5 and #7 and #8 and #9<br><br>Indexes=SCI-EXPANDED, SSCI, A&HCI, CPCI-S, CPCI-SSH, BKCI-S, BKCI-SSH, ESCI, CCR-EXPANDED, IC<br>Timespan=All years                                                                                                                                          | 711       |
| <b># 11</b> | (#10) AND LANGUAGE: (English)<br><br>Indexes=SCI-EXPANDED, SSCI, A&HCI, CPCI-S, CPCI-SSH, BKCI-S, BKCI-SSH, ESCI, CCR-EXPANDED, IC<br>Timespan=2016-2020                                                                                                                                    | 417       |

|     |                                                                                                                                                                                                                                                                                                                                                                                                                                                                                                                                                                                                                                                                                                                                                                                                              |     |
|-----|--------------------------------------------------------------------------------------------------------------------------------------------------------------------------------------------------------------------------------------------------------------------------------------------------------------------------------------------------------------------------------------------------------------------------------------------------------------------------------------------------------------------------------------------------------------------------------------------------------------------------------------------------------------------------------------------------------------------------------------------------------------------------------------------------------------|-----|
| #12 | <p data-bbox="355 300 1142 333">#10) AND LANGUAGE: (English)</p> <p data-bbox="355 367 1142 792">Refined by: [excluding] WEB OF SCIENCE CATEGORIES: ( LINGUISTICS OR MATHEMATICAL COMPUTATIONAL BIOLOGY OR ENVIRONMENTAL SCIENCES OR CRIMINOLOGY PENOLOGY OR BIODIVERSITY CONSERVATION OR CELL TISSUE ENGINEERING OR REGIONAL URBAN PLANNING OR CHEMISTRY ANALYTICAL OR TELECOMMUNICATIONS OR CHEMISTRY APPLIED OR TRANSPORTATION OR URBAN STUDIES OR ENGINEERING INDUSTRIAL OR ENVIRONMENTAL STUDIES OR GEOGRAPHY PHYSICAL OR ENGINEERING ELECTRICAL ELECTRONIC OR ENGINEERING MULTIDISCIPLINARY OR GREEN SUSTAINABLE SCIENCE TECHNOLOGY )</p> <p data-bbox="355 831 1142 927">Timespan: 2016-2020. Indexes: SCI-EXPANDED, SSCI, A&amp;HCI, CPCI-S, CPCI-SSH, BKCI-S, BKCI-SSH, ESCI, CCR-EXPANDED, IC.</p> | 384 |
|-----|--------------------------------------------------------------------------------------------------------------------------------------------------------------------------------------------------------------------------------------------------------------------------------------------------------------------------------------------------------------------------------------------------------------------------------------------------------------------------------------------------------------------------------------------------------------------------------------------------------------------------------------------------------------------------------------------------------------------------------------------------------------------------------------------------------------|-----|
