# Supplementary material
Source: HighWire-hosted journal article supplement (https://gh.bmj.com/content/8/3/e010157)
Supplement: inline-supplementary-material-2 [file inline-supplementary-material-2.pdf]

**Supplement 2.** Articles included in the review

| <b>Year</b> | <b>Author</b>                                                                           | <b>Article type</b> | <b>Location of institutional affiliation: first author</b> | <b>Location of institutional affiliation: last author</b> |
|-------------|-----------------------------------------------------------------------------------------|---------------------|------------------------------------------------------------|-----------------------------------------------------------|
| <b>2015</b> | Cheah PY, Tangseefa D, Somsaman A, Chunsuttiwat T, Nosten F, Day NPJ, Bull S, Parker M. | Qualitative study   | United Kingdom/Thailand                                    | United Kingdom                                            |
| <b>2015</b> | Denny SG, Silaigwana B, Wassenaar D, Bull S, Parker M.                                  | Qualitative study   | South Africa                                               | United Kingdom                                            |
| <b>2015</b> | Hate K, Meherally S, More NS, Jayaraman A, Bull S, Parker M, Osrin D.                   | Qualitative study   | India                                                      | United Kingdom                                            |
| <b>2015</b> | Jao I, Kombe F, Mwalukore S, Bull S, Parker M, Kamuya D, Molyneux S, Marsh V.(a)        | Qualitative study   | Kenya                                                      | Kenya/United Kingdom                                      |
| <b>2015</b> | Jao I, Kombe F, Mwalukore S, Bull S, Parker M, Kamuya D, Molyneux S, Marsh V.(b)        | Qualitative study   | Kenya                                                      | Kenya/United Kingdom                                      |
| <b>2015</b> | Merson L, Phong TV, Nhan LNT, Dung NT, Ngan TTD, Kinh NV, Parker M, Bull S..            | Qualitative study   | United Kingdom/Vietnam                                     | United Kingdom                                            |

|             |                                                                                                              |                                |                             |                             |
|-------------|--------------------------------------------------------------------------------------------------------------|--------------------------------|-----------------------------|-----------------------------|
| <b>2016</b> | Hayes R, Ayles H, Binka F, Cowan F, Kamali A, Kapiga S, Kleinschmidt I, Mayaud P, Patel V, Smith P, Weiss H. | Commentary/Conceptual analysis | United Kingdom              | United Kingdom <sup>1</sup> |
| <b>2016</b> | Merson L, Gaye O, Guerin PJ                                                                                  | Commentary/Conceptual analysis | United Kingdom/Vietnam      | United Kingdom              |
| <b>2016</b> | Rappert B, Bezuidenhout L                                                                                    | Qualitative study              | United Kingdom              | United Kingdom/South Africa |
| <b>2017</b> | Bezuidenhout L, Kelly AH, Leonelli S, Rappert B                                                              | Qualitative study              | United Kingdom/South Africa | United Kingdom              |
| <b>2017</b> | Cheah PY, Day NPJ                                                                                            | Case study                     | United Kingdom/Thailand     | Thailand/United Kingdom     |
| <b>2017</b> | Cheah PY, Day NPJ, Parker M, Bull S                                                                          | Case study                     | United Kingdom/Thailand     | United Kingdom              |
| <b>2018</b> | Akintola SO. (2018)                                                                                          | Commentary/Conceptual analysis | Nigeria                     | n/a                         |
| <b>2018</b> | Anane-Sarpong E, Wangmo T, Ward CL, Sankoh O, Tanner M, Elger BS.                                            | Qualitative study              | Ghana/Switzerland           | Switzerland                 |
| <b>2018</b> | Bezuidenhout L, Chakauya E                                                                                   | Quantitative study             | United Kingdom/South Africa | South Africa                |
| <b>2018</b> | Serwadda D, Ndebele P, Grabowski MK, Bajunirwe F, Wanyenze RK                                                | Commentary/Conceptual analysis | Uganda                      | Uganda                      |

<sup>1</sup> These authors were affiliated with the London School of Hygiene & Tropical Medicine, and are embedded in projects in Uganda, Tanzania and India

|             |                                                                                                         |                                |                          |                          |
|-------------|---------------------------------------------------------------------------------------------------------|--------------------------------|--------------------------|--------------------------|
| <b>2019</b> | Andanda P                                                                                               | Commentary/Conceptual analysis | South Africa             | n/a                      |
| <b>2019</b> | Barnes KI, Canario JA, Vernekar SS, Goudar SS, Espinal R, Merson L, Cheah PY.                           | Case study                     | South Africa             | United Kingdom/Thailand  |
| <b>2019</b> | Fernando B, King M, Sumathipala A                                                                       | Case study                     | Sri Lanka                | United Kingdom/Sri Lanka |
| <b>2019</b> | Humphreys GS, Tinto H, Barnes KI.                                                                       | Case study                     | United Kingdom           | South Africa             |
| <b>2019</b> | Vaz M, Palmero AG, Nyangulu W, Diallo AA, Ho CWL                                                        | Commentary/Conceptual analysis | India                    | Singapore/Hong Kong      |
| <b>2019</b> | Waithira N, Mutinda B, Cheah PY                                                                         | Commentary/Conceptual analysis | Thailand/United Kingdom  | Thailand/United Kingdom  |
| <b>2020</b> | Anane-Sarpong E, Wangmo T, Tanner M.                                                                    | Commentary/Conceptual analysis | Ghana/Switzerland        | Switzerland              |
| <b>2020</b> | Bull S, Bhagwandin N                                                                                    | Editorial                      | United Kingdom           | South Africa             |
| <b>2020</b> | Gorina Y, Redd JT, Hersey S, Jambai A, Meyer P, Kamara AS, Kamara A, Harding JD, Bangura B, Kamara MAM. | Case study                     | United States of America | Sierra Leone             |

**2020** Kaewkungwal J, Adams P,  
Sattabongkot J, Lie RK, Qualitative interviews Thailand United States of America  
Wendler D.
